# Supplementary material for: Fatty acid binding protein 4 promotes autoimmune diabetes by recruitment and activation of pancreatic islet macrophages
Source: PubMed Central journal article supplement (PMC8119222; doi:10.1172/jci.insight.141814), 2021-04-08
Supplement: jciinsight-6-141814-s128.pdf [file jciinsight-6-141814-s128.pdf]

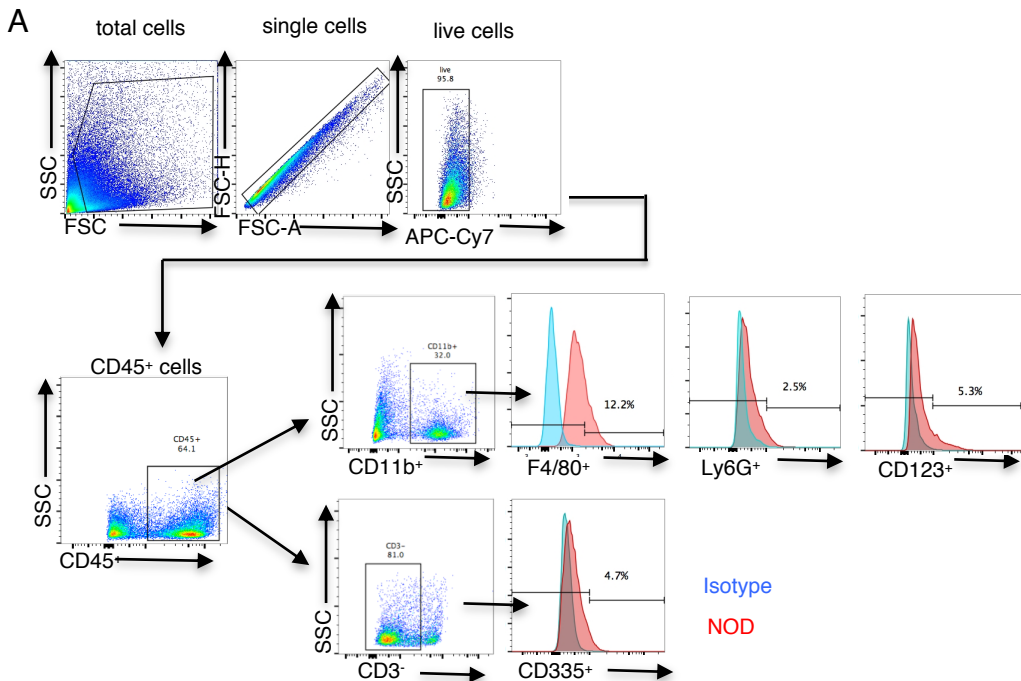

**B**

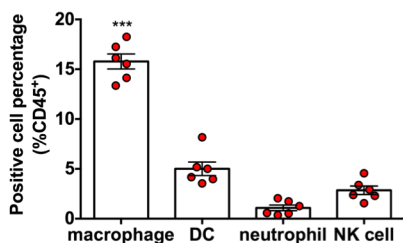

**Supplementary Figure 1. Abundance of innate immune cells in pancreas of 6-week-old NOD/shiLtJ mice. (A)**

Representative FACS plots showing the abundance of macrophages (CD45<sup>+</sup>F4/80<sup>+</sup>CD11b<sup>+</sup>), dendritic cells (CD45<sup>+</sup>CD123<sup>+</sup>CD11b<sup>+</sup>), neutrophils (CD45<sup>+</sup>Ly6G<sup>+</sup>CD11b<sup>+</sup>) and NK cells (CD45<sup>+</sup>CD3<sup>-</sup>CD335<sup>+</sup>) among CD45<sup>+</sup> cells in islets of 6-week-old NOD/shiLtJ mice, (n=6). **(B)** Quantification the percentage of macrophages (F4/80<sup>+</sup>CD11b<sup>+</sup>) and dendritic cells (CD123<sup>+</sup>CD11b<sup>+</sup>), neutrophils (Ly6G<sup>+</sup>CD11b<sup>+</sup>) and NK cells (CD3<sup>-</sup>CD335<sup>+</sup>) from live CD45<sup>+</sup> cells in islet of 6-week-old NOD/shiLtJ mice, (n=6). Data are expressed as mean ± standard deviation. \*\*\*p<0.001.

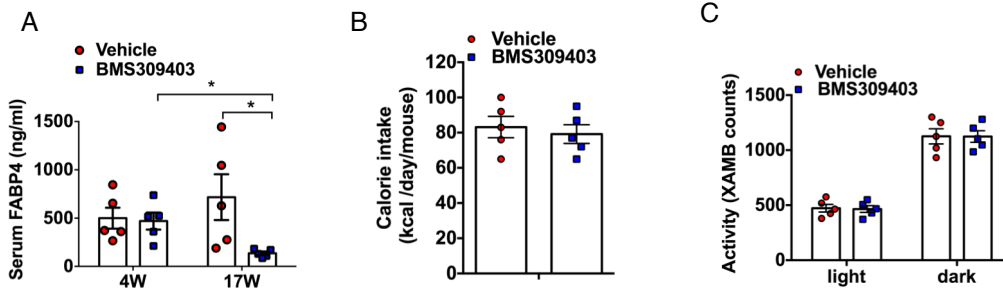

**Supplementary Figure 2. Treatment with BMS309403 does not affect food intake and physical activity in mice.** Female 4-week-old NOD mice were treated with BMS309403 ( $40 \text{ mg kg}^{-1} \text{ d}^{-1}$ ) or vehicle by oral gavage for 8 weeks. **(A)** Circulating level of FABP4 in NOD mice treated with BMS309403 or vehicle at 4-week and 17-week old. **(B)** Calorie intake of NOD mice treated with BMS309403 ( $40 \text{ mg kg}^{-1} \text{ d}^{-1}$ ) or vehicle. **(C)** Physical activity of above mice were determined by comprehensive laboratory animal monitoring system (CLAMS) analysis. Data are expressed as mean  $\pm$  standard deviation. N=5.

A

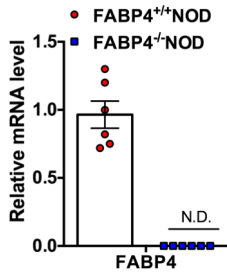

B

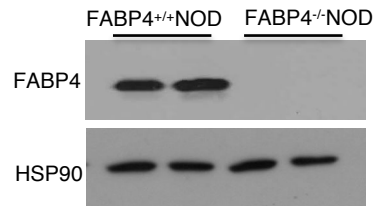

**Supplementary Figure 3. Characterization of FABP4<sup>+/+</sup>NOD and FABP4<sup>-/-</sup>NOD mice.** (A) The mRNA abundance of FABP4 in pancreas of FABP4<sup>+/+</sup>NOD and FABP4<sup>-/-</sup>NOD mice. (B) Representative immunoblots of FABP4 and HSP90 in pancreas isolated from FABP4<sup>+/+</sup>NOD and FABP4<sup>-/-</sup>NOD mice. Data are expressed as mean  $\pm$  standard deviation. N=6.

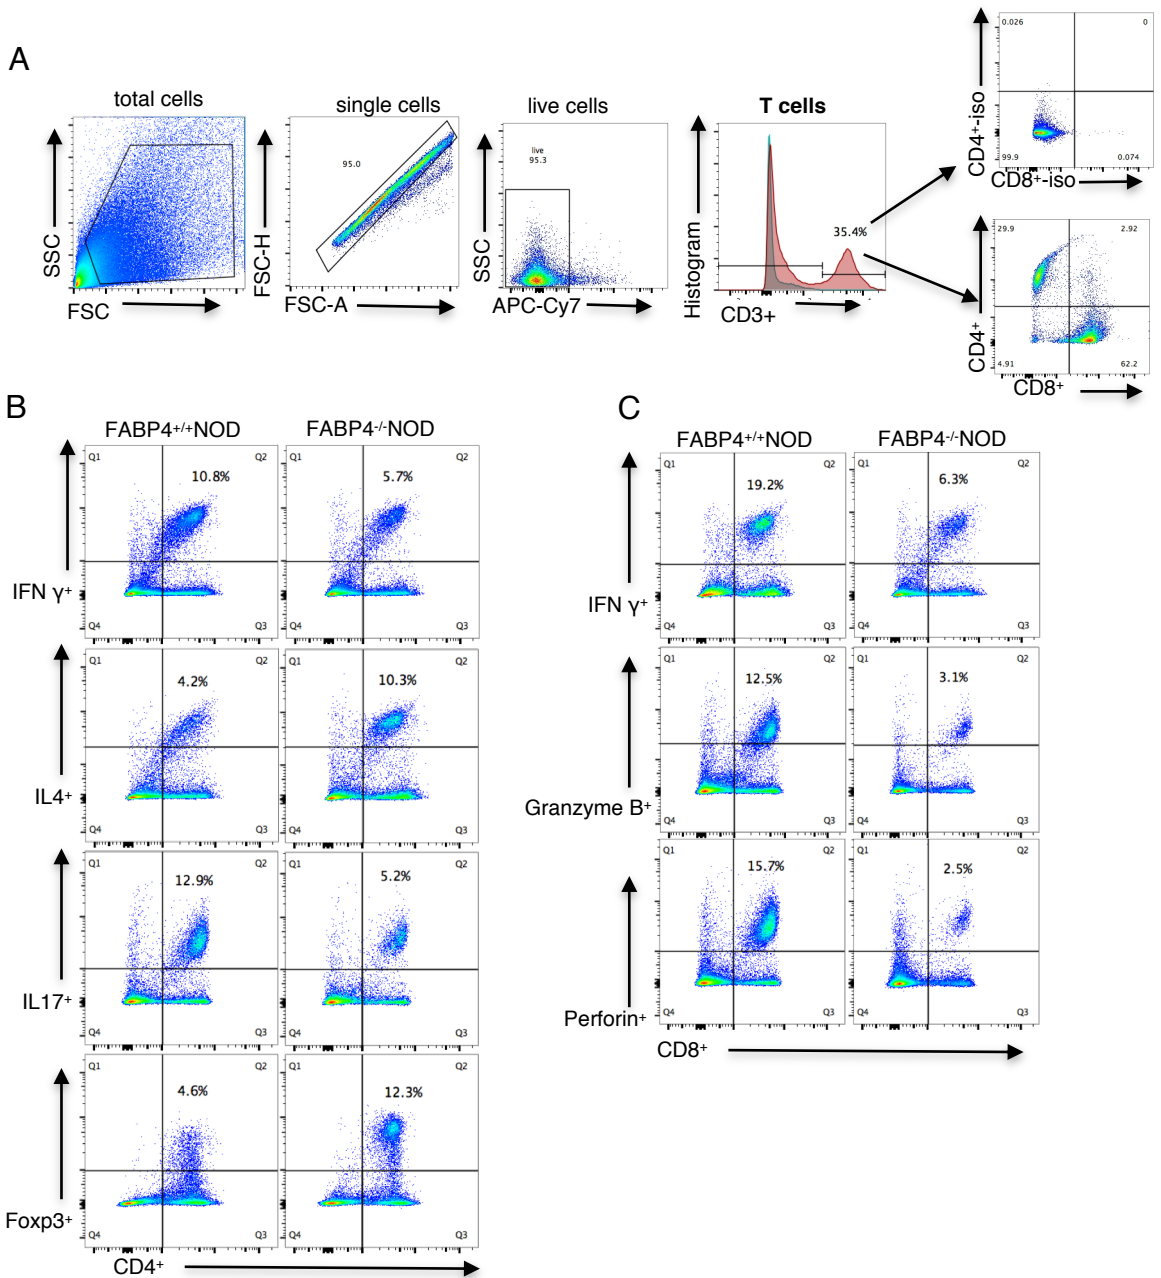

**Supplementary Figure 4. FABP4 deficiency reduces diabetogenic T cells.** (A) Gating strategy for Th (CD3<sup>+</sup>CD4<sup>+</sup>) T cells and cytotoxic T (CD3<sup>+</sup>CD8<sup>+</sup>) T cells in islets of 10-week-old NOD mice. (B) Representative FACS plots showing the abundance of Th1 (IFN $\gamma$ <sup>+</sup>CD4<sup>+</sup>), Th2 (IL4<sup>+</sup>CD4<sup>+</sup>), Th17 (IL17<sup>+</sup>CD4<sup>+</sup>) and Treg (Foxp3<sup>+</sup>CD4<sup>+</sup>) cells in pancreas of 10-week-old FABP4<sup>+/+</sup>NOD and FABP4<sup>-/-</sup>NOD mice. (C) Representative FACS plots showing the abundance of IFN $\gamma$ , granzymes B and perforin levels in cytotoxic T cell (CD3<sup>+</sup>CD8<sup>+</sup>) in pancreas of 10-week-old FABP4<sup>+/+</sup>NOD and FABP4<sup>-/-</sup>NOD mice. N=5.

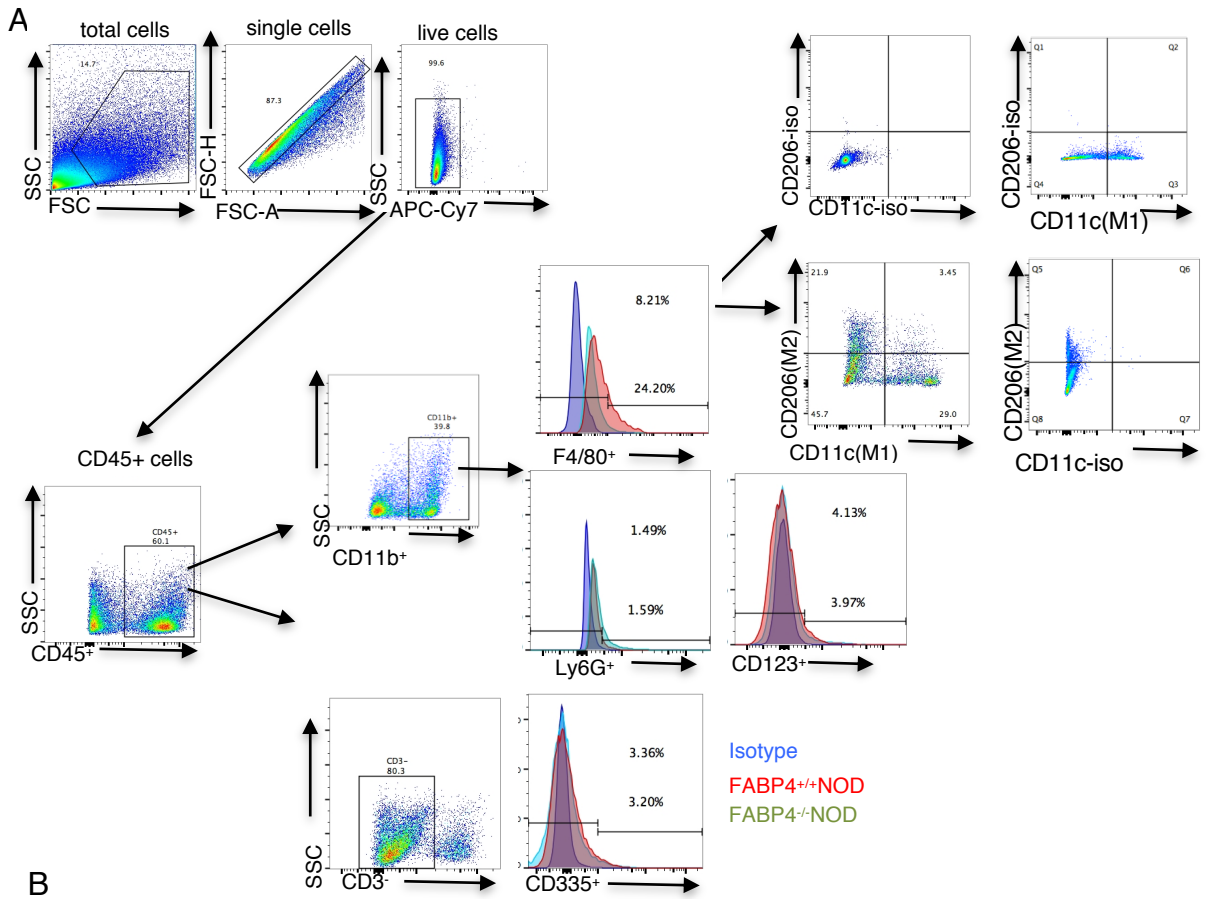

**Supplementary Figure 5. FABP4 deficiency does not alter the infiltration of DCs, neutrophils and NK cells in pancreas of NOD mice.** (A) Representative FACS plots showing the gating strategy and abundance of macrophages (CD45<sup>+</sup>CD11b<sup>+</sup>F4/80<sup>+</sup>) and their subtypes (M1:CD11c<sup>+</sup>, M2:CD206<sup>+</sup>), DCs (CD45<sup>+</sup>CD11b<sup>+</sup>CD123<sup>+</sup>), neutrophils (CD45<sup>+</sup>CD11b<sup>+</sup>Ly6G<sup>+</sup>) and NK cells (CD45<sup>+</sup>CD3<sup>-</sup>CD335<sup>+</sup>), and (B) Quantification of mean frequency values of these cells in pancreas among CD45<sup>+</sup> cells of 6-week-old FABP4<sup>+/+</sup>NOD and FABP4<sup>-/-</sup>NOD mice. Data are expressed as mean  $\pm$  standard deviation, \* $p < 0.05$ ,  $n = 5$ .

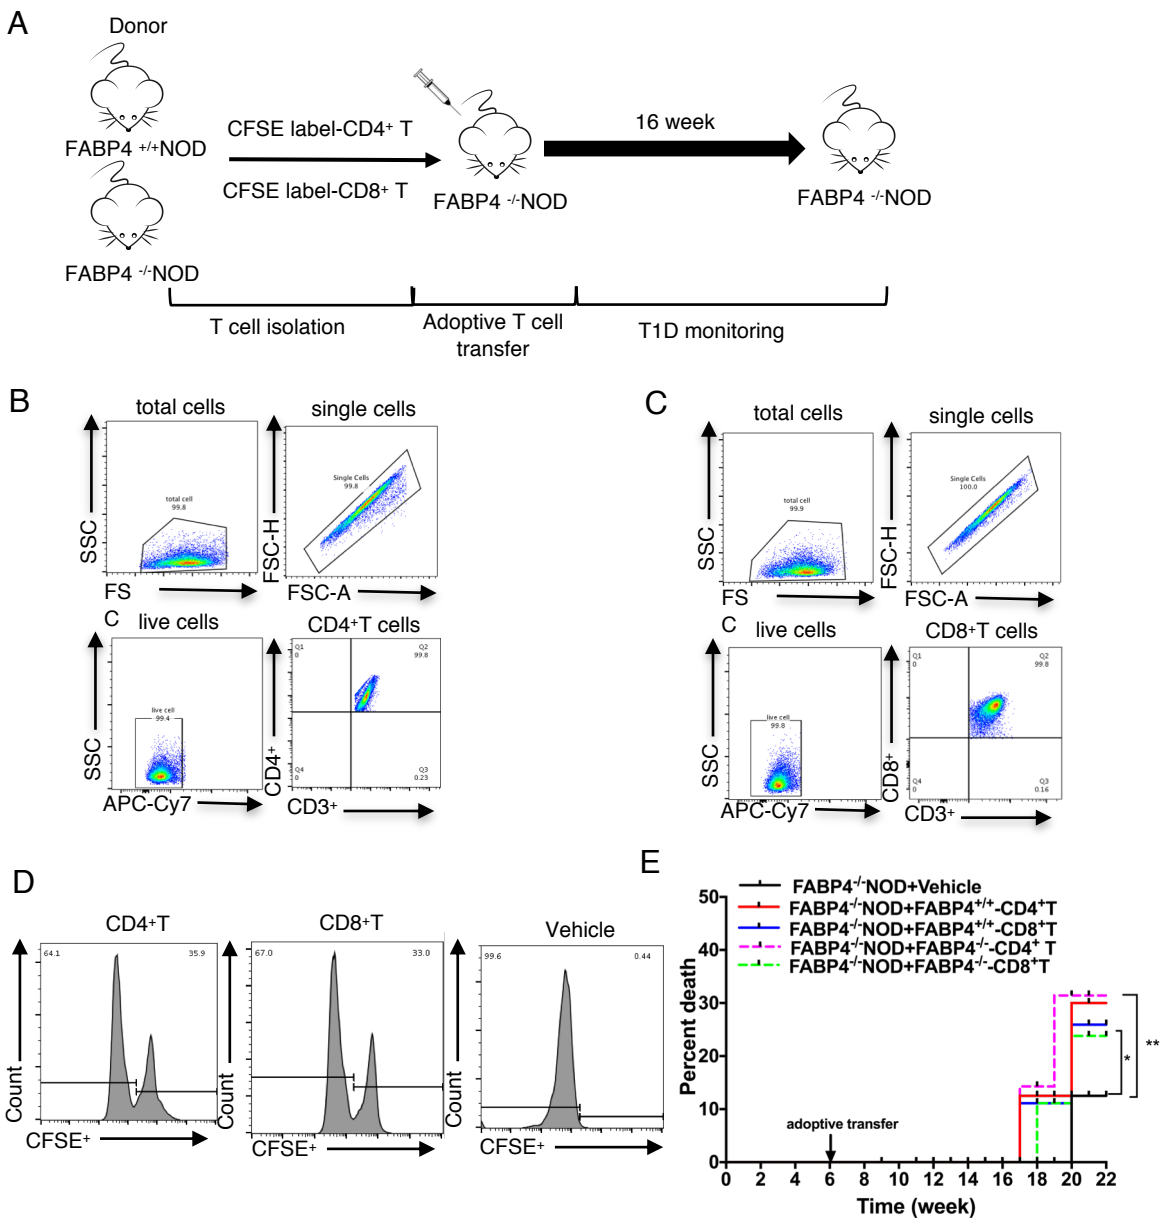

**Supplementary Figure 6. FABP4 does not alter the diabetogenic effect of T cells in FABP4<sup>-/-</sup>NOD mice. (A)** Schematic diagram showing the experimental protocol of adoptive transfer of diabetogenic T cells into FABP4<sup>-/-</sup>NOD mice. CD4<sup>+</sup>T or CD8<sup>+</sup>T cells ( $5 \times 10^6$  cells) were isolated from 6-week-old FABP4<sup>+/+</sup>NOD or FABP4<sup>-/-</sup>NOD mice using magnetic beads (Miltenyi Biotech), labelled with 5  $\mu$ M CFSE in PBS, and adoptively transferred into 6-week old FABP4<sup>-/-</sup>NOD mice (i.p), followed by monitoring diabetes incidence for 16 weeks (n=15). **(B-C)** Representative flow cytometry confirming the purity of isolated of **(B)** CD4<sup>+</sup> or **(C)** CD8<sup>+</sup>T lymphocytes. **(D)** Confirmation of the success of adoptive transfer of CFSE-labelled CD4<sup>+</sup>T or CD8<sup>+</sup> T cells in the pancreatic lymph nodes of recipient FABP4<sup>-/-</sup>NOD mice by flow cytometry analysis (n=5). **(E)** Diabetes incidence in FABP4<sup>-/-</sup>NOD mice at different ages after adoptive transfer of diabetogenic T cells were compared using Pearson's chi-square test (n=10), \*p<0.05.

| Sequences of primers for FABP4 genotype (Sequence 5'-3') |                          |
|----------------------------------------------------------|--------------------------|
| FABP4 WT S2 (Forward)                                    | CTTCTGAGGTGCACTCTATCCTC  |
| FABP4 KO S1 (Forward)                                    | TGCATCGCATTGTCTGAGTAGGTG |
| FABP4 CONAS1 (Reverse)                                   | AGGTCTTGTATGCCACAGCGGAC  |

**Supplementary table 1.** Sequences of the primers used for genotyping in this study.

| Gene name                            | 5'-3' sequence                  | 3'-5' sequence                    |
|--------------------------------------|---------------------------------|-----------------------------------|
| <i>Mouse FABP4</i>                   | ACA CCG AGA TTT CCT TCA AAC TG  | CCA TCT AGG GTT ATG ATG CTC TTC A |
| <i>Mouse MCP-1</i>                   | CCACTCACCTGCTGCTACTCA           | TGGTGATCCTCTTGTAGCTCTC C          |
| <i>Mouse TNF <math>\alpha</math></i> | CCCTCACACTCAGATCATCTTCT         | GCTACGACGTGGGCTACAG               |
| <i>Mouse IL-1<math>\beta</math></i>  | CTTCTTCGACACATGGGATAAC          | TTTGGGATCTACACTCTCCAGC            |
| <i>Mouse IFN <math>\gamma</math></i> | AGA GGA TGG TTT GCA TCT GGG TCA | ACA ACG CTA TGC AGC TTG TTC GTG   |
| <i>Mouse Arg1</i>                    | TGGCTTGCAGACGTAGAC              | GCTCAGGTGAATCGGCCTTTT             |
| <i>Mouse iNOS</i>                    | CCAAGCCCTCACCTACTTCC            | CTCTGAGGGCTGACACAAGG              |
| <i>Mouse GAPDH</i>                   | ACTCCACTCTTCCACCTTC             | TCTTGCTCAGTGCCTTGC                |
| <i>Human FABP4</i>                   | GGCATGGCCAAACCTAACAT            | TTCCATCCCATTCTGCACAT              |
| <i>Human GAPDH</i>                   | CGCCACAGTTTCCCGGAGGG            | CCCTCCAAAATCAAGTGGGG              |

**Supplementary table 2.** Sequences of the primers used for real-time PCR in this study. Related to RNA Extraction and Real-Time PCR in STARMETHODS.

| Antibodies                                            | Source         | Identifier                       |
|-------------------------------------------------------|----------------|----------------------------------|
| Rat anti-mouse F4/80 (clone BM8)                      | Biolegend      | Cat#123107, RRID AB_893500       |
| Hamster against mouse CD11c-PE (clone HL3)            | BD Biosciences | Cat#553802, Entrez Gene ID 16411 |
| Rat anti-mouse CD206-Alexa Fluor® 647 ( clone C068C2) | Biolegend      | Cat#141712, RRID AB_10900420     |
| Rat anti-mouse CD11b-BV421 (Clone M1/70 )             | BD Biosciences | Cat#562605, Entrez Gene ID 16409 |
| Rat anti-mouse CD123-PE (clone 5B11)                  | Biolegend      | Cat#106005, RRID AB_2124403      |
| Rat anti-mouse CD335-APC (clone 29A1.4)               | Biolegend      | Cat#137608, RRID AB_10612758     |
| Rat anti-mouse Ly-6G-FITC (clone 1A8)                 | Biolegend      | Cat#127605, RRID AB_1236488      |
| rat anti-mouse CD3-APC ( clone 17A2)                  | Biolegend      | Cat#100236, RRID AB_2561456      |
| rat anti-mouse CD4-FITC (clone GK1.5 )                | Biolegend      | Cat#100406, RRID AB_312691       |
| rat anti-mouse CD8a-PE (clone 53-6.7)                 | BD Biosciences | Cat#561095, RRID AB_312691       |
| rat anti-mouse CD4-Alexa Fluor® 594 ( clone GK1.5)    | Biolegend      | Cat#100446, RRID AB_2563182      |
| rat anti-mouse CD8a-Alexa Fluor® 594 ( clone 53-6.7)  | Biolegend      | Cat#100758, RRID AB_2563237      |
| Rat anti-mouse Foxp3-PE (clone R16715)                | BD Biosciences | Cat#563101                       |
| Rat anti-mouse IFN-γ-Alex Fluor 647 ( clone XMG1.2)   | BD Biosciences | Cat#557735                       |
| Rat anti-mouse IL-4-PE ( clone 11B11)                 | BD Biosciences | Cat#554435                       |
| Rat anti-mouse IL-17A-PE (clone TC11-18H10)           | BD Biosciences | Cat#559502                       |
| Mouse anti-human/mouse granzyme B-PE (clone QA16A02)  | Biolegend      | Cat#372208, RRID AB_2687032      |
| rat anti-mouse perforin-PE ( clone S16009B)           | Biolegend      | Cat#154406, RRIDAB_2721641       |
| insulin                                               | HyTest         | Cat#2IP10-D6C4                   |
| Cleaved Caspase-3 (Asp175) (5A1E) Rabbit mAb          | Cell Signaling | Cat#9664                         |
| Anti-F4/80 antibody [Cl:A3-1]                         | Abcam          | Cat#6640                         |
| Mouse/Rat FABP4/A-FABP Antibody                       | R&D Systems    | Cat#AF1443                       |
| HSP90 (C45G5) Rabbit mAb                              | Cell Signaling | Cat#4877                         |



## Continued

| <b>Chemicals, Peptides, and Recombinant Proteins</b> | <b>Source</b>     | <b>Identifier</b>    |
|------------------------------------------------------|-------------------|----------------------|
| Red blood cell (RBC) lysis buffer                    | BioLegend         | Cat#420301           |
| LIVE/DEAD fixable near-IR dead cell stain            | Molecular Probes  | Cat#L34975           |
| Fixation/Permeabilization kit                        | eBioscience       | Cat#00-5523          |
| Protease inhibitor cocktail tablets                  | Roche             | Cat#04 693 116 001   |
| Enhanced chemiluminescence reagents                  | GE Healthcare     | Cat#RPN2232          |
| RNAiso Plus                                          | Takara            | Cat#9109             |
| PrimeScript RT reagent kit                           | Takara            | Cat#RR037A           |
| SYBR Premix Ex Taq                                   | Takara            | Cat#RR420D           |
| Gadolinium trichloride (Gdcl3)                       | Sigma–Aldrich     | Cat#439770           |
| Collagenase P                                        | Roche Diagnostics | Cat#11213857001      |
| phorbol 12-myristate 13-acetate (PMA)                | Sigma–Aldrich     | Cat#P8139            |
| ionomycin                                            | Sigma–Aldrich     | Cat#Calbiochem407953 |
| GolgiStop™ protein transport inhibitor               | BD Biosciences    | Cat#554724           |
| <b>Critical Commercial Assays</b>                    | <b>Source</b>     | <b>Identifier</b>    |
| Adipocyte FABP (FABP4) Mouse ELISA                   | Biovendor         | Cat# RD291036200R    |
| Mouse Insulin ELISA, Ultra sensitive                 | Immunodiagnosics  | Cat# 32380           |
| <b>Oligonucleotides</b>                              | <b>Source</b>     | <b>Identifier</b>    |
| Real-time PCR primers used in this study             | See Table S1      | N/A                  |
| Primers used for genotyping in this study            | See Table S2      | N/A                  |

| Continued                                   |                                     |                                                                                               |
|---------------------------------------------|-------------------------------------|-----------------------------------------------------------------------------------------------|
| Experimental Models: Organisms/Strains      | Source                              | Identifier                                                                                    |
| NOD/ShiLtJ                                  | The Jackson Laboratory              | Stock No: 001976                                                                              |
| FABP4 <sup>-/-</sup> in C57BL/6N background | Shu et al. 2017.                    | N/A                                                                                           |
| Software and instrument                     | Source                              | Identifier                                                                                    |
| FlowJo version X.0.7                        | Tree Star                           | <a href="https://www.flowjo.com/solutions/flowjo">https://www.flowjo.com/solutions/flowjo</a> |
| Image J                                     | National Institutes of Health (NIH) | <a href="https://imagej.nih.gov/ij/">https://imagej.nih.gov/ij/</a>                           |
| GraphPad Prism 7                            | GraphPad                            | <a href="https://www.graphpad.com/">https://www.graphpad.com/</a>                             |

**Supplementary table 3. Key resources table.**
